1  
2  
3  
4  
5  
6  
7  
8  
9  
10  
11  
12  
13  
14  
15  
16  
17  
18  
19  
20  
21  
22  
23

**An infant mouse model of influenza virus transmission demonstrates the role of virus-specific shedding, humoral immunity, and sialidase expression by colonizing *Streptococcus pneumoniae*.**

Mila Brum Ortigoza,<sup>a</sup> Simone Blaser,<sup>b</sup> M. Ammar Zafar,<sup>c,\*</sup> Alexandria Hammond,<sup>c</sup> Jeffrey N. Weiser,<sup>c,#</sup>

<sup>a</sup> Department of Medicine, Division of Infectious Diseases, New York University School of Medicine, New York, New York, USA

<sup>b</sup> New York University School of Medicine, New York, New York, USA

<sup>c</sup> Department of Microbiology, New York University School of Medicine, New York, New York, USA

Running Title: Infant mouse model of influenza virus transmission

# Address correspondence to Jeffrey N. Weiser, [jeffrey.weiser@nyulangone.org](mailto:jeffrey.weiser@nyulangone.org)

\* Present address: Department of Microbiology and Immunology, Wake Forrest School of Medicine, Winston-Salem, NC

Word count: Abstract (368), Text (4692)

24 **ABSTRACT**

25

26       The pandemic potential of influenza A viruses (IAV) depends on the infectivity of  
27 the host, transmissibility of the virus, and susceptibility of the recipient. While virus traits  
28 supporting IAV transmission have been studied in detail using ferret and guinea pig  
29 models, there is limited understanding of host traits determining transmissibility and  
30 susceptibility because current animal models of transmission are not sufficiently  
31 tractable. Although mice remain the primary model to study IAV immunity and  
32 pathogenesis, the efficiency of IAV transmission in adult mice has been inconsistent.  
33 Here we describe an infant mouse model which support efficient transmission of IAV.  
34 We demonstrate that transmission in this model requires young age, close contact,  
35 shedding of virus particles from the upper respiratory tract (URT) of infected pups, the  
36 use of a transmissible virus strain, and a susceptible recipient. We characterize  
37 shedding as a marker of infectiousness that predicts the efficiency of transmission  
38 among different influenza virus strains. We also demonstrate that transmissibility and  
39 susceptibility to IAV can be inhibited by humoral immunity via maternal-infant transfer of  
40 IAV-specific immunoglobulins, and modifications to the URT milieu, via sialidase activity  
41 of colonizing *Streptococcus pneumoniae* (Spn). Due to its simplicity and efficiency, this  
42 model can be used to dissect the host's contribution to IAV transmission and explore  
43 new methods to limit contagion.

44 **IMPORTANCE**

45

46           This study provides insight into the role of the virus strain, age, immunity, and  
47 URT flora on IAV shedding and transmission efficiency. Using the infant mouse model,  
48 we found that: (a) differences in viral shedding of various IAV strains is dependent on  
49 specific hemagglutinin (HA) and/or neuraminidase (NA) proteins; (b) host age plays a  
50 key role in the efficiency of IAV transmission; (c) levels of IAV-specific immunoglobulins  
51 are necessary to limit infectiousness, transmission, and susceptibility to IAV; and (d)  
52 expression of sialidases by colonizing Spn antagonize transmission by limiting the  
53 acquisition of IAV in recipient hosts. Our findings highlight the need for strategies that  
54 limit IAV shedding, and the importance of understanding the function of the URT  
55 bacterial composition in IAV transmission. This work reinforces the significance of a  
56 tractable animal model to study both viral and host traits affecting IAV contagion, and its  
57 potential for optimizing vaccines and therapeutics that target disease spread.

58 **INTRODUCTION**

59

60           Influenza virus infections continue to cause 140,000-700,000 hospitalizations and  
61 12,000-56,000 deaths in the United States annually (1). For the 2017-2018 season  
62 alone, more than 900,000 people were hospitalized and 80,000 people died from  
63 influenza (2). Despite the availability of vaccines which have been efficacious at  
64 preventing hospitalizations, morbidity, and mortality, evidence that the inactivated  
65 influenza virus (IIV) vaccine blocks virus acquisition, shedding, or transmission has  
66 been limited in animal models (3-7). In addition, the low vaccination coverage (in the  
67 population) and low vaccine effectiveness (due to viral antigenic drift) likely contributes  
68 to the limited effects of the IIV vaccine (8, 9). Likewise, available therapeutics, primarily  
69 neuraminidase inhibitors (NI), have been shown to be effective at reducing the duration  
70 of illness if treatment is initiated within 24 hours of symptom onset (10-13). However, NI  
71 treatment of index cases alone shows limited effectiveness reducing viral shedding or  
72 transmission, possibly due to its short therapeutic window (10, 11, 14, 15). These  
73 limitations of our current options to prevent disease spread highlight a critical aspect of  
74 the IAV ecology that needs further study: contagion.

75           While IAV transmission has been studied in human, ferret, and guinea pig  
76 models, there is a general lack of understanding about the host influence on viral  
77 transmission, because none of these models are easily manipulated. Hence, scientific  
78 progress to date has emphasized viral genetics, viral tropism, and environmental  
79 impacts on transmission (16-19). While these factors contribute to knowledge about IAV

80 contagion, host characteristics that could affect transmissibility, including the highly  
81 variable composition of the URT flora, remain largely unexplored.

82         This knowledge gap could be addressed with the use of mice, whose practical  
83 features (small, inexpensive, inbred), expansive reagent repertoire, and availability of  
84 genetically-modified hosts allows for studies of extraordinary intricacy providing a  
85 significant research advantage. Since the 1930s, the mouse model has been essential  
86 in understanding IAV immunity and pathogenesis, and early studies described its  
87 usefulness in evaluating IAV transmission (20, 21). However, the use of mice for  
88 studying IAV transmission has been largely disregarded due to marked differences  
89 among studies and low transmission rates (22-24). Nevertheless, recent reports have  
90 revived the potential of the murine species as an IAV transmission model (23-28).  
91 Therefore, in this study, we sought to reevaluate the mouse as a tool to study the  
92 biology of IAV contagion, particularly the contribution of host factors.

## 93 **RESULTS**

94

### 95 **Infant mice support efficient influenza virus transmission.**

96         Given the remarkable capacity of infant mice to support IAV transmission among  
97 littermates (25), we sought to validate and optimize the infant mouse as a potential new  
98 model to study IAV transmission. Restricted URT infection of infant C57BL/6J pups in a  
99 litter (index) was performed with low volume intranasal (IN) inoculum (3 $\mu$ l) using IAV  
100 strain A/X-31 (H3N2) (24, 29). Intralitter transmission was assessed in littermates  
101 (contact/recipient) by measuring virus from retrograde tracheal lavages at 4-5 days  
102 post-infection (p.i.) (Fig.1A). A/X-31 virus was selected to model transmission because  
103 of its intermediate virulence in mice (30) and ability to replicate in the URT to high titers  
104 with natural progression to the lungs, simulating key features of the infectious course in  
105 humans. Furthermore, the 50% mouse infectious dose (MID<sub>50</sub>) in this model is 4-5  
106 plaque forming units (PFU), suggesting high susceptibility to A/X-31 infection.  
107 Transmission efficiency was observed to be 100% when index and contact pups were  
108 housed together at the time of IAV inoculation (Fig.1B). Transmission declined the  
109 longer the index and recipient pups were housed apart prior to being in direct contact,  
110 and was completely eliminated when housed together after 72 hours of separation  
111 (Fig.1C and Fig. S1). This observation suggested that in this model, transmission from  
112 index to recipient is most effective within the first 72-hour period of contact.

113         To determine the window of viral acquisition in recipient mice, an 8-day IAV  
114 transmission experiment was performed (Fig. 1D). The observed growth of IAV in the  
115 URT of recipient pups suggested that *de novo* virus acquisition occurred between 2-3

116 days after contact with the index. Hence, the infectious window for the index pups  
117 corresponded with the timing of IAV acquisition in contact pups.

118         Given that pups gain weight as they grow, morbidity in this model was assessed  
119 by observing a decrease in weight gain during the infectious period. Mild morbidity of  
120 pups was observed in both the index and contact groups, with complete recovery from  
121 IAV infection by 10 days p.i. (Fig. 1E).

122

### 123 **Direct contact between pups is required for influenza virus transmission.**

124         Because infant mice need their mother for survival during the first 21 days of life,  
125 they cannot be separately housed, therefore this model cannot differentiate between  
126 airborne versus droplet routes of transmission. To distinguish between direct and  
127 indirect contact routes of transmission, the mother and housing contents were evaluated  
128 as potential fomites. This was done by daily switching the mothers or the cages with  
129 bedding between infected and uninfected litters, respectively (Fig. S2A-B). Inefficient or  
130 no transmission was observed, suggesting that direct (close) contact between pups is  
131 the main mode of transmission. Occasionally during a transmission experiment, the  
132 mother in the cage became infected with IAV from close contact with her infected pups  
133 (Fig. S2C). Although the acquisition of IAV in the mother was a rare event, we did not  
134 observe a decline in transmission in contact pups when the mother did not become  
135 infected, despite the mother being capable of transmitting IAV to her pups if she were to  
136 be inoculated with IAV as the index case (Fig. 2D).

137

### 138 **Role of shedding of influenza virus from the upper respiratory tract.**

139 To determine the correlates of transmission, an assay was developed to quantify  
140 infectious virus expelled from the nasal secretions of pups. This assay allowed us to  
141 follow the journey of particle exit from index pups to acquisition by contact pups over the  
142 course of the transmission period. Index pups in a litter were infected with A/X-31 and  
143 cohoused with uninfected littermates for 10 days. The nares of each mouse was gently  
144 dipped in viral media daily, and virus titers were assessed for each sample (Fig. 3A).  
145 We observed that index pups, like in humans (31), began shedding virus from day 1 p.i.,  
146 whereas recipient pups, who acquired IAV infection between day 2-3 (Fig. 1D), began  
147 shedding virus from day 4 post contact (Fig. 3B). This pattern of virus transit suggested  
148 that the timing of peak shedding from the index (days 1-3) corresponded with the timing  
149 of transmission to recipient pups (days 2-4) (Fig. S3) further confirming that a key  
150 determinant of IAV transmission in this model is shedding of virus from the secretions of  
151 index pups. Notably, detectable shedding in the contacts lagged transmission (higher  
152 transmission rate compared to number of contacts shedding virus), because of the  
153 period of viral replication required prior to the detection of shed virus (Fig. S3).

154

### 155 **Transmission efficiency of influenza viruses in mice is virus and age-dependent.**

156 Virus strain has been shown to be important in the efficiency of transmission in  
157 adult mice (20, 23, 26, 32). We thus tested the capacity of infant mice to support  
158 transmission of other IAV subtypes and an influenza B virus (IBV) (Table 1).  
159 Transmission among pups was greater for influenza A/H3N2 viruses and IBV, but lower  
160 for A/H1N1 viruses. Notably, A/X-31 was more efficiently transmitted compared to its



161 parent A/PR/8/1934 virus, suggesting that either the HA and/or NA proteins are  
162 responsible for efficient shedding and transmission of IAV in infant mice.

163 Surprisingly, the mean viral URT titers in index pups did not correlate with IAV  
164 transmission ( $r=0.315$ ), indicating that virus replication in the URT alone was insufficient  
165 to mediate effective transmission. To determine the cause of the differences in  
166 transmission efficiencies observed among virus strains, the shedding for each virus was  
167 analyzed. We observed that virus shed from index pups correlated with IAV  
168 transmission ( $r=0.8663$ ), further supporting virus shedding as the main determinant of  
169 IAV transmission efficiency in infant mice (Fig. S4A-B).

170 Given the effectiveness of the infant mouse in supporting transmission of IAV, we  
171 evaluated the disparities of transmission efficiency previously reported in adult mice (20-  
172 23, 26). Mice infected with A/X-31 at different ages were housed with uninfected age-  
173 matched contacts, and transmission efficiency was assessed at 5 days p.i. (Table 2).  
174 We observed that 100% transmission was sustained in mice up to 7-days of age.  
175 Weaned and active adult mice (>28 days of age) failed to sustain efficient transmission  
176 altogether. Furthermore, mouse age correlated with transmission rate among contact  
177 mice ( $r=-0.8346$ ) (Fig. S4C), confirming that in the murine model, the requirement for  
178 young age is necessary to support efficient IAV transmission. Although the transmission  
179 experiments in this study were done with an IAV inoculum of 250 PFU, and increasing  
180 the inoculum size to  $10^3$ - $10^5$  PFU correlated with increasing IAV titers in the URT tract  
181 of index mice ( $r=0.9264$ ), inoculum size was not associated with more efficient  
182 transmission among adult mice ( $r=-0.2582$ ) (Fig. S4D).

183

184 **Humoral immunity from prior influenza virus infection limits shedding and**  
185 **transmission.**

186 To further validate the relationship of viral shedding and transmission, we  
187 evaluated the role of IAV-specific immunity in this model. Because pups are infected at  
188 a young age and lack a fully functional adaptive immune response, it was necessary to  
189 provide IAV immunity via the mother (from prior IAV infection), who would then transfer  
190 immunoglobulins to her pups either pre-natally via trans-placental passage or post-  
191 natally via breastfeeding. Pups from immune mothers who were subjected to an  
192 intralitter IAV transmission experiment shed significantly fewer virus over the first 5 days  
193 of infection compared to pups from non-immune mothers (Fig. 3A left). Reduced  
194 shedding was associated with decreased transmission (20%) among immune litters  
195 ( $p < 0.0001$ ) (Fig. 3A below graph). To determine if the passage of anti-IAV  
196 immunoglobulins occurred pre-natally or post-natally, mothers were switched shortly  
197 after delivery such that an immune mother raised pups from a non-immune mother or  
198 vice-versa. These cross-foster experiments demonstrated that maternal passage of  
199 immunoglobulins either pre-natally or post-natally decreased IAV shedding amongst all  
200 pups, and that transmission to contact pups was more efficiently blocked when maternal  
201 antibodies were passed post-natally via breastfeeding ( $p < 0.01$ ) (Fig. 3A right). IAV-  
202 specific serum IgG was detected in immune mothers and pups born or cared by  
203 immune mothers, with the transfer of IgG via breastfeeding yielding higher titer of  
204 antibodies in these pups (Fig. 3B). IAV-specific serum IgA was detected in previously-  
205 infected mothers but unlike IgG was not passed to their pups in significant amounts  
206 (Fig. S4).

207  
208 ***Streptococcus pneumoniae* colonization of the upper respiratory tract decreases**  
209 **influenza virus acquisition via bacterial sialidase activity.**

210         There is increasing evidence of the important role of the host's gut microbiome  
211 on IAV-specific immunity in the respiratory tract (33, 34). Yet, there is only one study  
212 evaluating the role of the URT microbiota in IAV infection (35) and no studies on its  
213 effect on transmission. This is surprising given that the nasopharynx, a non-sterile  
214 environment extensively colonized by a diverse bacterial flora, is the first location  
215 encountered by IAV. Since Spn carriage is highest in children (36, 37), Spn colonization  
216 often precedes IAV infection in childhood (38, 39). Given that infant mice support  
217 efficient Spn colonization in the URT (25, 40), we investigated the impact of Spn  
218 colonization on IAV transmission. All pups in a litter were colonized with Spn prior to IAV  
219 infection of index pups to control for the efficient pup-to-pup transmission of Spn in the  
220 setting of IAV infection (25). IAV shedding was collected daily for each pup prior to  
221 evaluating for IAV transmission in contact littermates at 4 days p.i (Fig. 4A). We  
222 observed that the Spn colonized contact mice acquired IAV at a decreased rate (32%)  
223 as compared to uncolonized mice (100%) ( $p < 0.0001$ ) (Fig. 5B below graph), which  
224 corresponded to lower viral shedding among colonized contacts (Fig. 5B left). Since  
225 index Spn colonized and uncolonized mice infected with IAV (via inoculation) shed IAV  
226 at similar levels, this suggested an antagonistic effect of Spn colonization on IAV  
227 transmission through decreased acquisition by contact mice (Fig. 5B left).

228         Previous studies showed that sialidases expressed by colonizing Spn depletes  
229 host sialic acid (SA) from the epithelial surface of the murine URT, allowing Spn to

230 utilize free SA for its nutritional requirements (41). Given that IAV requires SA for  
231 efficient attachment, we evaluated the role of Spn sialidases on IAV acquisition. We  
232 generated a double mutant lacking two common Spn sialidases: NanA and NanB  
233 (*SpnnanA<sup>-</sup>nanB<sup>-</sup>*), and tested its ability to alter IAV transmission in our system. These  
234 bacterial sialidases preferentially cleave 2,3-, 2,6-, and 2,8- or only 2,3-linked SA,  
235 respectively (42). We found that by colonizing mice with the *SpnnanA<sup>-</sup>nanB<sup>-</sup>* mutant, we  
236 completely restored the efficiency of IAV transmission from 32% to 100% ( $p < 0.0001$ )  
237 (Fig. 5B middle). We then tested the single sialidase mutants (*SpnnanA<sup>-</sup>*- and *SpnnanB<sup>-</sup>*-)  
238 and found that the presence of NanA (via *SpnnanB<sup>-</sup>*- colonization) was sufficient to limit  
239 IAV acquisition by contacts by 50% ( $p < 0.001$ ). Notably, there was no correlation  
240 between the colonization density of the bacterial mutants and their effect on shedding or  
241 transmission.

242 To determine the role of sialidases in general in IAV acquisition, infant index and  
243 contact mice were treated IN twice daily with *Vibrio cholerae* neuraminidase (VCNA),  
244 which cleaves both 2,3- and 2,6-linked sialic acids (43). We found that, like Spn NanA,  
245 VCNA treatment was sufficient to decrease IAV acquisition (71.4%) and inhibit shedding  
246 by the contacts (Fig. 5B right). Together, these observations suggest that sialidase  
247 activity from colonizing bacteria has the capacity to inhibit IAV acquisition in the URT,  
248 specifically via its cleavage of 2,3- and 2,6-linked SA.

249 **DISCUSSION**

250

251           The inability to study in detail the host's role in IAV transmission has been a  
252 major drawback of the ferret and guinea pig animal models, and has limited our current  
253 understanding of IAV contagion (16-19). Herein we established an efficient and  
254 tractable infant mouse IAV transmission model with the goal of utilizing the extensive  
255 resources of mouse biology, to explore the role that host factors, immune pathways,  
256 and the URT flora play in IAV transmission.

257           Our study corroborated previous findings that infant mice support efficient and  
258 consistent IAV transmission (20, 25), and document an age-dependent effect on the  
259 efficiency of transmission, highlighting inefficient transmission in adult mice. This  
260 suggests an inherent quality of younger mice (i.e. less mobility allowing closer contact,  
261 suckling, presence/absence of a host factor, microbiota composition, immunodeficient  
262 or developmental status) which facilitates the shedding and transmissibility of IAV. In  
263 humans, young age correlates with increased IAV nasopharyngeal shedding (44) and  
264 longer duration of shedding (45), increasing the potential for transmission in this age  
265 group. Although it has been shown in the study of Edenborough (23) that 56-day old  
266 adult mice support the transmission of A/X-31 and A/Udorn/307/72 (H3N2) viruses at  
267 100% efficiency in BALB/c mice, we were unable to observe comparable efficiency in  
268 transmission using our A/X-31 virus in C57BL/6J mice older than 28-days of age. The  
269 work of Lowen (22) also failed to observe IAV transmission in adult BALB/c mice, further  
270 supporting an inconsistent transmission phenotype observed in adult mice which has  
271 limited its utilization as an IAV transmission model. Notably, we are the first to

272 demonstrate that infant mice support efficient IBV transmission, which contrasts with the  
273 inefficient IBV transmission previously reported in adult mice (32).

274 Although not evaluated in this study, the difference in mouse strains could also  
275 affect the irregular success of IAV transmission in adult mice. One mouse strain,  
276 C57BL/6J, has been tested in infant mice and demonstrated 100% transmission  
277 efficiency in two independent studies (present study and (25)). In contrast, several  
278 mouse strains have been tested for IAV transmission among adult mice, with variable  
279 efficiencies among studies (0 to 100%) despite using the similar virus strains. They  
280 include BALB/c (22, 23, 26, 28), C57BL/6J (present study), *Mx1*-competent C57BL/6J  
281 (24), Swiss Webster (20, 26, 46), New Colony Swiss (47), Manor Farms (MF-1) (32),  
282 DBA/2J (26), and Kunming (27). We learned from these studies that, host traits (mouse  
283 age, strain, microbiota composition) all contribute to the infectivity and susceptibility of  
284 the murine species to IAV, and the host's contribution to transmission should be  
285 explored further using an efficient and tractable model of human disease.

286 Several studies have demonstrated that virus strain is an important determinant  
287 of IAV transmission in mice (20, 23, 32, 46, 48). Like more recent studies (23, 48), we  
288 highlighted the increased efficiency of transmission of A/H3N2 over A/H1N1 viruses. In  
289 addition, A/H2N2 viruses (not tested here) have also shown to have increased  
290 transmission efficiency in mice over A/H1N1 viruses (32, 46). Although we have not  
291 evaluated specific viral moieties that confer a transmissible phenotype, the viral HA has  
292 been demonstrated to play a role in transmission in mice (23). In addition, we postulate  
293 that the activity of some NA in combination with specific HA favors viral release from the  
294 nasal epithelium which allows viral shedding and transmission in mice. Thus together,

295 our data highlights that both host and viral-specific features are important to consider to  
296 understand the requirements for IAV transmissibility.

297 We demonstrated that free virus particles present in secretions of mice, and not  
298 replicating virus in the URT, correlated with IAV transmission efficiency. A similar  
299 observation was also reported by Schulman (32), Edenborough (23), and Carrat (31)  
300 demonstrating that transmissibility was associated with greater shedding of virus in  
301 index mice, higher viral titers in the saliva of index mice, and shedding of virus from  
302 infected humans, respectively. These studies supported our conclusion that viruses  
303 which replicate in the URT without having the ability to exit the host (via shedding)  
304 cannot be transmitted efficiently. Additionally, studies by Milton (44) suggested that URT  
305 symptoms was associated with nasopharyngeal shedding in humans, and that coughing  
306 was not necessary for the spread of infectious virus. This helps explain how mice,  
307 which lack the cough reflex, can still produce and shed infectious virions. This  
308 emphasizes an important future role of the infant mouse IAV transmission model as a  
309 tool to study viral shedding as a surrogate marker of IAV contagion.

310 Two host traits have been identified in this study that influence IAV transmission:  
311 IAV-specific immunoglobulin and the URT microbiota. The passive transfer of maternal  
312 immunity is transferred via the placenta pre-natally in an IgG-dependent manner (49,  
313 50), or via breastmilk post-natally mediated by several factors: immunoglobulins,  
314 leukocytes, and antimicrobial/anti-inflammatory factors (51-53). Our data recapitulates  
315 the value of maternal-infant transfer of IAV-specific IgG as a correlate of infant  
316 immunity, by demonstrating a significant inhibitory effect on viral shedding and  
317 transmission of infant mice after experimental (inoculation) and natural infection (via

318 transmission). Our experiments also demonstrate that IAV-specific serum IgG is  
319 predominantly transferred via breastfeeding in mice, as previously reported (53, 54).  
320 The concept of maternal serum IgG passage via breastmilk in mice has not often been  
321 recognized, even though it has been shown to occur (53, 55-57). IgG can be  
322 synthesized locally in the mammary gland, transferred across the mammary gland  
323 epithelium, and subsequently transported from the infant gut to the circulation via  
324 neonatal Fc receptors (FcRn) expressed in the proximal intestine (58-60). Although this  
325 mechanism of maternal IgG acquisition by infants has not yet been correlated in  
326 humans, presence of FcRn in the human intestine has been confirmed (61, 62). Our  
327 study does not address the contribution of secretory IgA, which is known to be the most  
328 abundant immunoglobulin in breastmilk. Yet, our data suggest that adequate amounts  
329 of IAV-specific IgG, which is known to wane within 8 weeks of birth in infants (63),  
330 maybe necessary to maintain anti-IAV immunity in the URT and limit IAV transmission  
331 in infants, given that at this young age, infants don't have a fully functional adaptive  
332 immune response.

333 In addition to humoral immunity, our study identified an inhibitory role for the  
334 common URT colonizer, Spn, at the step of viral acquisition during transmission of IAV.  
335 This phenomenon has never been previously observed, although there has been some  
336 evidence suggesting that the preceding colonization of Spn reduces IAV infection (25,  
337 64). Notably, the study by McCullers (64) showed that preceding colonization with Spn  
338 protected mice from mortality after IAV challenge, whereas the reverse process: prior  
339 infection with IAV with subsequent challenge with Spn yielded the opposite effect. This  
340 implied that the timing of pathogen encounter mattered, and the composition of the host



341 microbiota may serve a “prophylactic-like” protective effect. Although no studies have  
342 evaluated the role of the respiratory microbiota on IAV transmission, we hypothesize  
343 that the differences between the transmissibility of different IAV strains and  
344 susceptibility of different populations (infants vs adults) to IAV may be due to a  
345 combined effect of the virus’s ability to release from SA and exit the host via shedding,  
346 and the susceptibility to viral acquisition by contact hosts based on the composition of  
347 their URT microbiota. Our work provides proof-of-principle and highlights the  
348 amenability of the infant mouse model as a tool to understand the complex dynamics of  
349 virus and host, and their combined effect in IAV transmission.

350 Lastly, we demonstrate the role of Spn sialidases, NanA and NanB, in  
351 antagonizing the acquisition and shedding of IAV by contact mice. We hypothesize that  
352 bacteria-driven de-sialylation of the host’s URT glycoproteins for use as nutrient (41),  
353 may deplete SA residues necessary for IAV adhesion and infection, thus limiting virus  
354 susceptibility, and hence acquisition. Notably, the antagonistic effect of bacterial  
355 sialidases on IAV shedding of the index group is not statistically different from  
356 uncolonized controls. This is analogous to the clinical effects of NI, whereby oseltamivir  
357 treatment of index cases alone has not been shown to reduce viral shedding (10, 11).  
358 Only when treatment of both index and naïve contacts were partaken (as in post-  
359 exposure prophylaxis), has the effects of NI been effective at preventing acquisition of  
360 infection among the contact group (12, 13). Because SA is the primary recognition  
361 moiety for many viral respiratory pathogens, the concept of utilizing bacterial sialidases  
362 as a broad antiviral agent is currently being explored in humans, although its effect on  
363 transmission has not yet been evaluated (65-72).

364           While the advantages of using murine models are evident, these can also be  
365 drawbacks. Humans are genetically diverse, live in complex environments, and have  
366 been exposed to a myriad of pathogens, all of which can affect transmissibility and  
367 susceptibility to IAV, therefore findings generated in animal models of human disease  
368 should always be cautiously interpreted. Nevertheless, studying the complexities of IAV  
369 transmission biology in a tractable animal model such as infant mice, will allow intricate  
370 and sophisticated investigations, which will further our understanding of IAV contagion  
371 that may translate into better vaccines and therapeutics.

372 **MATERIALS AND METHODS**

373

374 **Mice.** C57BL/6J mice (Jackson Laboratories, ME) were maintained and bred in a  
375 conventional animal facility. Pups were housed with their mother for the duration of all  
376 experiments. Animal studies were conducted in accordance with the *Guide for the Care*  
377 *and Use of Laboratory Animals* (73), and approved by the *Institutional Animal Care and*  
378 *Use Committee* of NYU Langone Health (Assurance Number A3317-01). All procedures  
379 were in compliance with *Biosafety in Microbiological and Biomedical Laboratories*.

380

381 **Cells and viruses.** Madin-Darby canine kidney (MDCK) cells were cultured in  
382 Dulbecco's modified Eagle's medium with 10% fetal bovine serum and 1% penicillin-  
383 streptomycin (Gibco).

384 Viruses: A/X-31 (H3N2) [HA/NA genes from A/Aichi/2/1968 and internal genes from  
385 A/Puerto Rico/8/1934], a gift from Jan Erikson (U. Penn), whose sequence has been  
386 deposited in GenBank (XXXXXX). The following reagents were obtained through BEI

387 Resources (NIAID, NIH): A/X-47 (H3N2) [HA/NA genes from A/Victoria/3/1975 and  
388 internal genes from A/Puerto Rico/8/1934] [NR-3663], A/Hong Kong/1/1968-2 MA 21-2

389 (H3N2) [NR-28634], A/Puerto Rico/8/1934 (H1N1) V-301-011-000 [NR-3169],

390 A/WSN/1933 (H1N1) [NR-2555], A/Brisbane/59/2007 (H1N1) [NR-12282],

391 A/California/4/2009 (H1N1) [NR-13659], B/Lee/1940 V-302-001-000 [NR-3178]. IAV and

392 IBV were propagated in 8-10-day old embryonated chicken eggs (Charles River, CT) for

393 2 days at 37°C and 33°C, respectively. All viruses were tittered by standard plaque

394 assay in MDCK cells in the presence of TPCK (tolylsulfonyl phenylalanyl chloromethyl

395 ketone)-treated trypsin (Thermo Scientific) (74). Purified virus for ELISA was prepared  
396 by harvesting allantoic fluid from eggs containing virus followed by centrifugation  
397 (3,000×g, 30min, 4°C) to remove debris. Viruses were pelleted through a 30% sucrose  
398 cushion (30% sucrose in NTE buffer [100mM NaCl+10mM Tris-HCl+1mM EDTA], pH  
399 7.4) by ultracentrifugation (83,000×g, 2hrs), resuspended in phosphate-buffered saline  
400 (PBS), and stored at -80°C.

401

402 **Virus infection, shedding, and transmission.** Pups in a litter (4-7 days of age) were  
403 infected (index) with a 3µl sterile PBS inoculum without general anesthesia (to avoid  
404 direct lung inoculation) by IN instillation of 250 PFU of IAV (unless otherwise specified),  
405 and returned to the litter at the time of inoculation for the duration of the experiment.  
406 Shedding of virus was collected by dipping the nares of each mouse in viral media  
407 (PBS+0.3% BSA) daily, and samples evaluated via plaque assay. Intralitter  
408 transmission was assessed in littermates (contact) at 4-5 days p.i. (day 10-14 of life).  
409 Pups and mother were euthanized by CO<sub>2</sub> asphyxiation followed by cardiac puncture,  
410 the URT was subjected to a retrograde lavage (flushing 300µl PBS from the trachea and  
411 collecting through the nares), and samples were used to quantify virus (via plaque  
412 assay or qRT-PCR) or Spn density (described below). Ratio of index to contact pups  
413 ranged from 1:3-1:4.

414 Where indicated, pups were IN treated twice daily with 90 µU (3µl inoculum) of *Vibrio*  
415 *cholerae* neuraminidase (VCNA, Sigma-Aldrich).

416 The MID<sub>50</sub> was calculated by the Reed and Muench method (75).

417

418 **Induction of maternal IAV immunity.** Adult female mice were infected IN with 250  
419 PFU of A/X-31 in a 6 $\mu$ l inoculum without anesthesia. Mice were left to recover from  
420 infection for 7 days prior to breeding. Litters of immune mothers were used in  
421 experiments.

422

423 **Bacteria strain construction and culture.** A streptomycin-resistant derivative of  
424 capsule type-4 isolate TIGR4 (**P2406**) was used in this study and cultured on tryptic-soy  
425 (TS)-agar-streptomycin (200 $\mu$ g/ml) plates (40). The *nanA*- knockout strain (**P2508**) was  
426 constructed by transforming P2406 with genomic DNA from strain P2082 (76)  
427 (MasterPure DNA purification kit, Illumina), and selection on TS-agar-chloramphenicol  
428 (2.5 $\mu$ g/ml) plates. The *nanB*- knockout strain (**P2511**) was constructed by amplifying the  
429 Janus cassette (77) from genomic DNA of strain P2408 (78), with flanking upstream and  
430 downstream regions to the *nanB* gene added via isothermal assembly. Strain P2406  
431 was transformed with the PCR product, and the transformants selected on TS-agar-  
432 kanamycin (125 $\mu$ g/ml) plates. The *nanA-nanB*- double knockout strain (**P2545**) was  
433 constructed by transforming P2511 with genomic DNA from strain P2508, and  
434 transformants selected on TS-agar-chloramphenicol plates.

435 Spn strains were grown statically in TS broth (BD, NJ) at 37°C to an optical density  
436 (OD) 620nm of 1.0. For quantitation, serial dilutions (1:10) of the inoculum or URT  
437 lavages were plated on TS-agar-antibiotic selection plates with 100 $\mu$ l catalase (30,000  
438 U/ml, Worthington Biochemical) and incubated overnight (37°C, 5% CO<sub>2</sub>). Bacteria were  
439 stored in 20% glycerol at -80°C. Colonization of pups was carried out by IN instillation  
440 of 10<sup>3</sup> CFU in 3 $\mu$ l of PBS, 1 or 3 days prior to IAV infection.

441

442 **qRT-PCR.** Following a retrograde URT lavage with 300µl RLT lysis buffer, RNA was  
443 isolated (RNeasy Kit, Qiagen), cDNA was generated (High-Capacity RT kit, Applied  
444 Biosystems), and used for quantitative PCR (SYBR Green PCR Master Mix, Applied  
445 Biosystems). Results were analyzed using the  $2^{-\Delta\Delta CT}$  method (79) by comparison to  
446 GAPDH transcription. Values represent the fold change over uninfected.

447  
448 **ELISA.** Immulon 4 HBX plates (Thermo Scientific) were coated with 5µg/ml purified A/X-  
449 31 in coating buffer (0.015M Na<sub>2</sub>CO<sub>3</sub>+0.035M NaHCO<sub>3</sub>, 50µl/well), and incubated  
450 overnight, 4°C. After three washes with PBS-T (PBS+0.1% Tween 20, 100µl/well),  
451 plates were incubated with blocking solution (BS) (PBS-T+0.5% milk powder+3% goat  
452 serum [ThermoFisher], 1hr, 20°C). BS was discarded, mice sera were diluted to a  
453 starting concentration of 1:100, then serially diluted 1:2 in BS (100µl/well), and  
454 incubated (2hr, 20°C). Three washes with PBS-T was done prior to adding secondary  
455 antibody (horseradish peroxidase [HRP]-labeled anti-mouse IgG [whole Ab], GE  
456 Healthcare or alkaline phosphatase [AP]-labeled anti-mouse IgA [α chain], Sigma)  
457 diluted in BS (1:3000, 50µl/well). After incubation (1hr, 20°C) and three washes with  
458 PBS-T, plates were developed for 10min using 100µl/well SigmaFast OPD (o-  
459 phenylenediamine dihydrochloride [Sigma] and stopped with 3M HCl (50µl/well) or  
460 developed for 1-18hr using pNPP (p-nitrophenyl phosphate) [KPL];). Plates were read at  
461 OD490nm for the OPD substrate or 405nm for the AP substrate. The endpoint titers  
462 were determined by calculating the dilution at which the absorbance is equal to 0.1. The  
463 geometric mean titers (GMT) were calculated from the reciprocal of the endpoint titers.

464

465 **Statistical analysis.** GraphPad Prism 7 software was used for all statistical analyses.  
466 Unless otherwise noted, data were analyzed using the Mann-Whitney *U* test to compare  
467 two groups, and the Kruskal-Wallis test with Dunn's post-analysis for multiple group  
468 comparisons.  
469  
470 **Data Availability.** The authors confirm that data will be made publicly available upon  
471 publication upon request, without restriction.

472

473 **ACKNOWLEDGMENTS**

474

475 We thank Elodie Guedin (NYU) for the sequencing of A/X-31. MBO was supported by  
476 the NYU Division of Infectious Diseases, Department of Medicine Silverman  
477 Scholarship, and Physician Scientist Training Program Award; SB was supported by the  
478 NYU School of Medicine and National Institute of Diabetes & Digestive & Kidney  
479 Diseases fellowship. This project was supported by grants from the U.S. Public Health  
480 Service to JNW (AI038446 and AI105168).



481 **REFERENCES**

- 482
- 483 1. Rolfes MA FI, Garg S, Flannery B, Brammer L, Singleton JA, et al. 2016.  
484 Estimated Influenza Illnesses, Medical Visits, Hospitalizations, and Deaths  
485 Averted by Vaccination in the United States.  
486 <https://www.cdc.gov/flu/about/disease/2015-16.htm>. Accessed 9/2018.
- 487 2. CDC. 9/27/2018. National Press Conference Kicks Off 2018-2019 Flu  
488 Vaccination Campaign. [https://www.cdc.gov/flu/spotlights/press-conference-  
489 2018-19.htm#ref1](https://www.cdc.gov/flu/spotlights/press-conference-2018-19.htm#ref1). Accessed 9/2018.
- 490 3. Flannery B, Reynolds SB, Blanton L, Santibanez TA, O'Halloran A, Lu PJ, Chen  
491 J, Foppa IM, Gargiullo P, Bresee J, Singleton JA, Fry AM. 2017. Influenza  
492 Vaccine Effectiveness Against Pediatric Deaths: 2010-2014. *Pediatrics* 139.
- 493 4. Arriola C, Garg S, Anderson EJ, Ryan PA, George A, Zansky SM, Bennett N,  
494 Reingold A, Bargsten M, Miller L, Yousey-Hindes K, Tatham L, Bohm SR,  
495 Lynfield R, Thomas A, Lindegren ML, Schaffner W, Fry AM, Chaves SS. 2017.  
496 Influenza Vaccination Modifies Disease Severity Among Community-dwelling  
497 Adults Hospitalized With Influenza. *Clin Infect Dis* 65:1289-1297.
- 498 5. CDC. 9/19/2014. Selected Publications on Influenza Vaccine Effectiveness, *on*  
499 Centers for Disease Control and Prevention.  
500 <https://www.cdc.gov/flu/about/qa/publications.htm>. Accessed 9/2018.
- 501 6. Lowen AC, Steel J, Mubareka S, Carnero E, Garcia-Sastre A, Palese P. 2009.  
502 Blocking interhost transmission of influenza virus by vaccination in the guinea pig  
503 model. *J Virol* 83:2803-18.

- 504 7. Houser KV, Pearce MB, Katz JM, Tumpey TM. 2013. Impact of prior seasonal  
505 H3N2 influenza vaccination or infection on protection and transmission of  
506 emerging variants of influenza A(H3N2)v virus in ferrets. *J Virol* 87:13480-9.
- 507 8. CDC. 9/27/2018. 2017-18 Flu Season.  
508 <https://www.cdc.gov/flu/fluview/1718season.htm>. Accessed 10/2018.
- 509 9. CDC. 9/25/2018. Seasonal Influenza Vaccine Effectiveness, 2004-2018.  
510 <https://www.cdc.gov/flu/professionals/vaccination/effectiveness-studies.htm>.  
511 Accessed 10/2018.
- 512 10. Cheung DH, Tsang TK, Fang VJ, Xu J, Chan KH, Ip DK, Peiris JS, Leung GM,  
513 Cowling BJ. 2015. Association of Oseltamivir Treatment With Virus Shedding,  
514 Illness, and Household Transmission of Influenza Viruses. *J Infect Dis* 212:391-6.
- 515 11. Ng S, Cowling BJ, Fang VJ, Chan KH, Ip DK, Cheng CK, Uyeki TM, Houck PM,  
516 Malik Peiris JS, Leung GM. 2010. Effects of oseltamivir treatment on duration of  
517 clinical illness and viral shedding and household transmission of influenza virus.  
518 *Clin Infect Dis* 50:707-14.
- 519 12. Hayden FG, Belshe R, Villanueva C, Lanno R, Hughes C, Small I, Dutkowski R,  
520 Ward P, Carr J. 2004. Management of influenza in households: a prospective,  
521 randomized comparison of oseltamivir treatment with or without postexposure  
522 prophylaxis. *J Infect Dis* 189:440-9.
- 523 13. Welliver R, Monto AS, Carewicz O, Schatteman E, Hassman M, Hedrick J,  
524 Jackson HC, Huson L, Ward P, Oxford JS, Oseltamivir Post Exposure  
525 Prophylaxis Investigator G. 2001. Effectiveness of oseltamivir in preventing  
526 influenza in household contacts: a randomized controlled trial. *JAMA* 285:748-54.

- 527 14. Halloran ME, Hayden FG, Yang Y, Longini IM, Jr., Monto AS. 2007. Antiviral  
528 effects on influenza viral transmission and pathogenicity: observations from  
529 household-based trials. *Am J Epidemiol* 165:212-21.
- 530 15. Hayward A. 2010. Does treatment with oseltamivir prevent transmission of  
531 influenza to household contacts? *Clin Infect Dis* 50:715-6.
- 532 16. Herfst S, Schrauwen EJ, Linster M, Chutinimitkul S, de Wit E, Munster VJ, Sorrell  
533 EM, Bestebroer TM, Burke DF, Smith DJ, Rimmelzwaan GF, Osterhaus AD,  
534 Fouchier RA. 2012. Airborne transmission of influenza A/H5N1 virus between  
535 ferrets. *Science* 336:1534-41.
- 536 17. Imai M, Watanabe T, Hatta M, Das SC, Ozawa M, Shinya K, Zhong G, Hanson  
537 A, Katsura H, Watanabe S, Li C, Kawakami E, Yamada S, Kiso M, Suzuki Y,  
538 Maher EA, Neumann G, Kawaoka Y. 2012. Experimental adaptation of an  
539 influenza H5 HA confers respiratory droplet transmission to a reassortant H5  
540 HA/H1N1 virus in ferrets. *Nature* 486:420-8.
- 541 18. Schrauwen EJ, Fouchier RA. 2014. Host adaptation and transmission of  
542 influenza A viruses in mammals. *Emerg Microbes Infect* 3:e9.
- 543 19. Lowen AC, Mubareka S, Steel J, Palese P. 2007. Influenza virus transmission is  
544 dependent on relative humidity and temperature. *PLoS Pathog* 3:1470-6.
- 545 20. Eaton MD. 1940. Transmission of Epidemic Influenza Virus in Mice by Contact. *J*  
546 *Bacteriol* 39:229-41.
- 547 21. Schulman JL, Kilbourne ED. 1962. Airborne transmission of influenza virus  
548 infection in mice. *Nature* 195:1129-30.

- 549 22. Lowen AC, Mubareka S, Tumpey TM, Garcia-Sastre A, Palese P. 2006. The  
550 guinea pig as a transmission model for human influenza viruses. *Proc Natl Acad*  
551 *Sci U S A* 103:9988-92.
- 552 23. Edenborough KM, Gilbertson BP, Brown LE. 2012. A mouse model for the study  
553 of contact-dependent transmission of influenza A virus and the factors that  
554 govern transmissibility. *J Virol* 86:12544-51.
- 555 24. Klinkhammer J, Schnepf D, Ye L, Schwaderlapp M, Gad HH, Hartmann R,  
556 Garcin D, Mahlakoiv T, Staeheli P. 2018. IFN-lambda prevents influenza virus  
557 spread from the upper airways to the lungs and limits virus transmission. *Elife* 7.
- 558 25. Diavatopoulos DA, Short KR, Price JT, Wilksch JJ, Brown LE, Briles DE,  
559 Strugnell RA, Wijburg OL. 2010. Influenza A virus facilitates *Streptococcus*  
560 *pneumoniae* transmission and disease. *FASEB J* 24:1789-98.
- 561 26. Price GE, Lo CY, Misplon JA, Epstein SL. 2014. Mucosal immunization with a  
562 candidate universal influenza vaccine reduces virus transmission in a mouse  
563 model. *J Virol* 88:6019-30.
- 564 27. Wu R, Sui Z, Liu Z, Liang W, Yang K, Xiong Z, Xu D. 2010. Transmission of  
565 avian H9N2 influenza viruses in a murine model. *Vet Microbiol* 142:211-6.
- 566 28. Rigoni M, Toffan A, Viale E, Mancin M, Cilloni F, Bertoli E, Salomoni A, Marciano  
567 S, Milani A, Zecchin B, Capua I, Cattoli G. 2010. The mouse model is suitable for  
568 the study of viral factors governing transmission and pathogenesis of highly  
569 pathogenic avian influenza (HPAI) viruses in mammals. *Vet Res* 41:66.

- 570 29. Ivinson K, Deliyannis G, McNabb L, Grollo L, Gilbertson B, Jackson D, Brown LE.  
571 2017. Salivary Blockade Protects the Lower Respiratory Tract of Mice from  
572 Lethal Influenza Virus Infection. *J Virol* 91.
- 573 30. Bouvier NM, Lowen AC. 2010. Animal Models for Influenza Virus Pathogenesis  
574 and Transmission. *Viruses* 2:1530-1563.
- 575 31. Carrat F, Vergu E, Ferguson NM, Lemaître M, Cauchemez S, Leach S, Valleron  
576 AJ. 2008. Time lines of infection and disease in human influenza: a review of  
577 volunteer challenge studies. *Am J Epidemiol* 167:775-85.
- 578 32. Schulman JL. 1967. Experimental transmission of influenza virus infection in  
579 mice. IV. Relationship of transmissibility of different strains of virus and recovery  
580 of airborne virus in the environment of infector mice. *J Exp Med* 125:479-88.
- 581 33. Ichinohe T, Pang IK, Kumamoto Y, Peaper DR, Ho JH, Murray TS, Iwasaki A.  
582 2011. Microbiota regulates immune defense against respiratory tract influenza A  
583 virus infection. *Proc Natl Acad Sci U S A* 108:5354-9.
- 584 34. Rosshart SP, Vassallo BG, Angeletti D, Hutchinson DS, Morgan AP, Takeda K,  
585 Hickman HD, McCulloch JA, Badger JH, Ajami NJ, Trinchieri G, Pardo-Manuel  
586 de Villena F, Yewdell JW, Rehmann B. 2017. Wild Mouse Gut Microbiota  
587 Promotes Host Fitness and Improves Disease Resistance. *Cell* 171:1015-1028  
588 e13.
- 589 35. Lee KH, Gordon A, Shedden K, Kuan G, Ng S, Balmaseda A, Foxman B. 2018.  
590 The respiratory microbiome and susceptibility to influenza virus infection. *bioRxiv*  
591 doi:10.1101/372649.

- 592 36. Bogaert D, van Belkum A, Sluijter M, Luijendijk A, de Groot R, Rumke HC,  
593 Verbrugh HA, Hermans PW. 2004. Colonisation by *Streptococcus pneumoniae*  
594 and *Staphylococcus aureus* in healthy children. *Lancet* 363:1871-2.
- 595 37. Adler H, Ferreira DM, Gordon SB, Rylance J. 2017. Pneumococcal Capsular  
596 Polysaccharide Immunity in the Elderly. *Clin Vaccine Immunol* 24.
- 597 38. Takano M, Ozaki K, Nitahara Y, Higuchi W, Takano T, Nishiyama A, Yamamoto  
598 T. 2009. *Streptococcus pneumoniae* and *Haemophilus influenzae* at the initial  
599 stage of influenza. *Pediatr Int* 51:687-95.
- 600 39. Short KR, Habets MN, Hermans PW, Diavatopoulos DA. 2012. Interactions  
601 between *Streptococcus pneumoniae* and influenza virus: a mutually beneficial  
602 relationship? *Future Microbiol* 7:609-24.
- 603 40. Zafar MA, Kono M, Wang Y, Zangari T, Weiser JN. 2016. Infant Mouse Model for  
604 the Study of Shedding and Transmission during *Streptococcus pneumoniae*  
605 Monoinfection. *Infect Immun* 84:2714-22.
- 606 41. Siegel SJ, Roche AM, Weiser JN. 2014. Influenza promotes pneumococcal  
607 growth during coinfection by providing host sialylated substrates as a nutrient  
608 source. *Cell Host Microbe* 16:55-67.
- 609 42. Xu G, Kiefel MJ, Wilson JC, Andrew PW, Oggioni MR, Taylor GL. 2011. Three  
610 *Streptococcus pneumoniae* sialidases: three different products. *J Am Chem Soc*  
611 133:1718-21.
- 612 43. Moustafa I, Connaris H, Taylor M, Zaitsev V, Wilson JC, Kiefel MJ, von Itzstein  
613 M, Taylor G. 2004. Sialic acid recognition by *Vibrio cholerae* neuraminidase. *J*  
614 *Biol Chem* 279:40819-26.

- 615 44. Yan J, Grantham M, Pantelic J, Bueno de Mesquita PJ, Albert B, Liu F, Ehrman  
616 S, Milton DK, Consortium E. 2018. Infectious virus in exhaled breath of  
617 symptomatic seasonal influenza cases from a college community. *Proc Natl Acad*  
618 *Sci U S A* 115:1081-1086.
- 619 45. Ng S, Lopez R, Kuan G, Gresh L, Balmaseda A, Harris E, Gordon A. 2016. The  
620 Timeline of Influenza Virus Shedding in Children and Adults in a Household  
621 Transmission Study of Influenza in Managua, Nicaragua. *Pediatr Infect Dis J*  
622 35:583-6.
- 623 46. Schulman JL, Kilbourne ED. 1963. Experimental Transmission of Influenza Virus  
624 Infection in Mice. I. The Period of Transmissibility. *J Exp Med* 118:257-66.
- 625 47. Schulman JL, Kilbourne ED. 1963. Experimental Transmission of Influenza Virus  
626 Infection in Mice. II. Some Factors Affecting the Incidence of Transmitted  
627 Infection. *J Exp Med* 118:267-75.
- 628 48. Short KR, Reading PC, Wang N, Diavatopoulos DA, Wijburg OL. 2012.  
629 Increased nasopharyngeal bacterial titers and local inflammation facilitate  
630 transmission of *Streptococcus pneumoniae*. *MBio* 3.
- 631 49. Puck JM, Glezen WP, Frank AL, Six HR. 1980. Protection of infants from  
632 infection with influenza A virus by transplacentally acquired antibody. *J Infect Dis*  
633 142:844-9.
- 634 50. Reuman PD, Ayoub EM, Small PA. 1987. Effect of passive maternal antibody on  
635 influenza illness in children: a prospective study of influenza A in mother-infant  
636 pairs. *Pediatr Infect Dis J* 6:398-403.

- 637 51. Goldman AS. 1993. The immune system of human milk: antimicrobial,  
638 antiinflammatory and immunomodulating properties. *Pediatr Infect Dis J* 12:664-  
639 71.
- 640 52. Slade HB, Schwartz SA. 1987. Mucosal immunity: the immunology of breast milk.  
641 *J Allergy Clin Immunol* 80:348-58.
- 642 53. Reuman PD, Paganini CM, Ayoub EM, Small PA, Jr. 1983. Maternal-infant  
643 transfer of influenza-specific immunity in the mouse. *J Immunol* 130:932-6.
- 644 54. Brambell FW. 1969. The transmission of immune globulins from the mother to  
645 the foetal and newborn young. *Proc Nutr Soc* 28:35-41.
- 646 55. Macchiaverni P, Arslanian C, Frazao JB, Palmeira P, Russo M, Verhasselt V,  
647 Condino-Neto A. 2011. Mother to child transfer of IgG and IgA antibodies against  
648 *Dermatophagoides pteronyssinus*. *Scand J Immunol* 74:619-27.
- 649 56. Palmeira P, Costa-Carvalho BT, Arslanian C, Pontes GN, Nagao AT, Carneiro-  
650 Sampaio MM. 2009. Transfer of antibodies across the placenta and in breast milk  
651 from mothers on intravenous immunoglobulin. *Pediatr Allergy Immunol* 20:528-  
652 35.
- 653 57. Van de Perre P. 2003. Transfer of antibody via mother's milk. *Vaccine* 21:3374-6.
- 654 58. Cianga P, Medesan C, Richardson JA, Ghetie V, Ward ES. 1999. Identification  
655 and function of neonatal Fc receptor in mammary gland of lactating mice. *Eur J*  
656 *Immunol* 29:2515-23.
- 657 59. Roopenian DC, Akilesh S. 2007. FcRn: the neonatal Fc receptor comes of age.  
658 *Nat Rev Immunol* 7:715-25.



- 659 60. Mackenzie N. 1984. Fc receptor-mediated transport of immunoglobulin across  
660 the intestinal epithelium of the neonatal rodent. *Immunol Today* 5:364-6.
- 661 61. Israel EJ, Taylor S, Wu Z, Mizoguchi E, Blumberg RS, Bhan A, Simister NE.  
662 1997. Expression of the neonatal Fc receptor, FcRn, on human intestinal  
663 epithelial cells. *Immunology* 92:69-74.
- 664 62. Story CM, Mikulska JE, Simister NE. 1994. A major histocompatibility complex  
665 class I-like Fc receptor cloned from human placenta: possible role in transfer of  
666 immunoglobulin G from mother to fetus. *J Exp Med* 180:2377-81.
- 667 63. Nunes MC, Cutland CL, Jones S, Hugo A, Madimabe R, Simoes EA, Weinberg  
668 A, Madhi SA, Maternal Flu Trial T. 2016. Duration of Infant Protection Against  
669 Influenza Illness Conferred by Maternal Immunization: Secondary Analysis of a  
670 Randomized Clinical Trial. *JAMA Pediatr* 170:840-7.
- 671 64. McCullers JA, Rehg JE. 2002. Lethal synergism between influenza virus and  
672 *Streptococcus pneumoniae*: characterization of a mouse model and the role of  
673 platelet-activating factor receptor. *J Infect Dis* 186:341-50.
- 674 65. Bergelson LD, Bukrinskaya AG, Prokazova NV, Shaposhnikova GI, Kocharov  
675 SL, Shevchenko VP, Kornilaeva GV, Fomina-Ageeva EV. 1982. Role of  
676 gangliosides in reception of influenza virus. *Eur J Biochem* 128:467-74.
- 677 66. Griffin JA, Basak S, Compans RW. 1983. Effects of hexose starvation and the  
678 role of sialic acid in influenza virus release. *Virology* 125:324-34.
- 679 67. Air GM, Laver WG. 1995. Red cells bound to influenza virus N9 neuraminidase  
680 are not released by the N9 neuraminidase activity. *Virology* 211:278-84.

- 681 68. Thompson CI, Barclay WS, Zambon MC, Pickles RJ. 2006. Infection of human  
682 airway epithelium by human and avian strains of influenza A virus. *J Virol*  
683 80:8060-8.
- 684 69. Malakhov MP, Aschenbrenner LM, Smee DF, Wandersee MK, Sidwell RW,  
685 Gubareva LV, Mishin VP, Hayden FG, Kim DH, Ing A, Campbell ER, Yu M, Fang  
686 F. 2006. Sialidase fusion protein as a novel broad-spectrum inhibitor of influenza  
687 virus infection. *Antimicrob Agents Chemother* 50:1470-9.
- 688 70. Nicholls JM, Moss RB, Haslam SM. 2013. The use of sialidase therapy for  
689 respiratory viral infections. *Antiviral Res* 98:401-9.
- 690 71. Triana-Baltzer GB, Gubareva LV, Nicholls JM, Pearce MB, Mishin VP, Belser JA,  
691 Chen LM, Chan RW, Chan MC, Hedlund M, Larson JL, Moss RB, Katz JM,  
692 Tumpey TM, Fang F. 2009. Novel pandemic influenza A(H1N1) viruses are  
693 potently inhibited by DAS181, a sialidase fusion protein. *PLoS One* 4:e7788.
- 694 72. Salvatore M, Satlin MJ, Jacobs SE, Jenkins SG, Schuetz AN, Moss RB, Van  
695 Besien K, Shore T, Soave R. 2016. DAS181 for Treatment of Parainfluenza Virus  
696 Infections in Hematopoietic Stem Cell Transplant Recipients at a Single Center.  
697 *Biol Blood Marrow Transplant* 22:965-70.
- 698 73. U.S. Department of Health and Human Services NIOH. 2015. Public Health  
699 Service Policy on Humane Care and Use of Laboratory Animals.
- 700 74. Baer A, Kehn-Hall K. 2014. Viral concentration determination through plaque  
701 assays: using traditional and novel overlay systems. *J Vis Exp*  
702 doi:10.3791/52065:e52065.

- 703 75. Reed LJ, Muench H. 1938. A SIMPLE METHOD OF ESTIMATING FIFTY PER  
704 CENT ENDPOINTS<sup>12</sup>. American Journal of Epidemiology 27:493-497.
- 705 76. Dalia AB, Standish AJ, Weiser JN. 2010. Three surface exoglycosidases from  
706 Streptococcus pneumoniae, NanA, BgaA, and StrH, promote resistance to  
707 opsonophagocytic killing by human neutrophils. Infect Immun 78:2108-16.
- 708 77. Sung CK, Li H, Claverys JP, Morrison DA. 2001. An rpsL cassette, janus, for  
709 gene replacement through negative selection in Streptococcus pneumoniae. Appl  
710 Environ Microbiol 67:5190-6.
- 711 78. Lemon JK, Weiser JN. 2015. Degradation products of the extracellular pathogen  
712 Streptococcus pneumoniae access the cytosol via its pore-forming toxin. MBio 6.
- 713 79. Livak KJ, Schmittgen TD. 2001. Analysis of relative gene expression data using  
714 real-time quantitative PCR and the 2(-Delta Delta C(T)) Method. Methods  
715 25:402-8.
- 716

717 **FIGURE LEGENDS**

718

719 **Figure 1. Transmission of IAV in infant mice.**

720 (A) Schematic and timeline of experimental design. Index and contact pups were  
721 arbitrarily assigned, maintained in the same cage, and cared for by the same mother. At  
722 day 0 (4-7 days of age), pups were infected IN with 250 PFU of A/X-31 (index), and  
723 cohoused with uninfected littermates (contact) for 4-5 days prior to evaluating for  
724 transmission. (B) Transmission of IAV to contact pups was evaluated via qRT-PCR (left  
725 panel) or plaque assay (right panel) from retrograde URT lavages after sacrifice.  
726 URT titers are represented by a box plot extending from the minimum to maximum  
727 values for each data set. Each symbol represent the titer measured from a single pup  
728 with median values indicated by a line within the box. Index and contact pups are shown  
729 in black and red symbols, respectively. (C) Window of transmission was evaluated by  
730 separating index and contact pups for a defined period prior to contact. After infection of  
731 index pups, uninfected contact pups were housed apart (in a separate cage) for 0 and  
732 72 hours prior to cohousing with infected index for 5 days. Transmission to contact pups  
733 was evaluated via plaque assay from retrograde URT lavages. URT titers are  
734 represented by a box plot as described above. (D) Timecourse of A/X-31 transmission.  
735 Pups in a litter were subjected to an A/X-31 transmission experiment (described above)  
736 and transmission to contact pups was evaluated via qRT-PCR from retrograde URT  
737 lavages at indicated day post contact. Mean URT titers  $\pm$  standard deviation (SD) are  
738 represented. (E) Morbidity of A/X-31 infection in index and contact pups over the course  
739 of 20 days. Pups in a litter were subjected to an A/X-31 transmission experiment

740 (described above) and weight of each pup was measured daily. Percent of initial weight  
741  $\pm$  SD is represented (uninfected group n=9, index group n=3-4, contact group n=4-5).  
742 Differences among group means were analyzed using the Student's *t* test.  
743 All panels represent at least two independent experiments. \*  $p < 0.05$ , \*\*  $p < 0.01$ ,  
744 IAV=Influenza A virus, URT=upper respiratory tract, NP=nucleoprotein, PFU=plaque  
745 forming unit, LOD=Limit of detection.

746

### 747 **Figure 2. Shedding of IAV.**

748 (A) Image of infant mouse shedding procedure and schematic timeline of experimental  
749 design. At day 0 (4-7 days of age), pups were infected IN with 250 PFU of A/X-31  
750 (index), and cohoused with uninfected littermates (contact) for 10 days. Shedding of IAV  
751 was collected by dipping the nares of each mouse in viral media daily. (B) Shedding  
752 samples from each day were evaluated individually via plaque assay. Each symbol  
753 represents the shedding titer measured from a single mouse at the specified day. Index  
754 and contact pups are shown in black and red symbols, respectively. Mean values are  
755 connected by a line. IAV=Influenza A virus, PFU=plaque forming unit, LOD=Limit of  
756 detection.

757

### 758 **Figure 3. Maternal-infant transfer of IAV-specific immunity limits IAV shedding 759 and transmission.**

760 (A) Adult females were infected IN with 250 PFU of A/X-31 and were left to recover from  
761 infection prior to breeding. Soon after birth, pups born from previously infected  
762 (immune) mothers or those born from non-immune mothers were either left with their

763 biological mother or exchanged with a foster mother of opposite immune status. Pups  
764 paired with their biological or foster mothers were left to acclimate until 4-5 days of life,  
765 prior to being subjected to an IAV transmission experiment. Schematic for each  
766 experimental condition is shown. Pups in a litter were infected IN with 250 PFU of A/X-  
767 31 (index), and cohoused with uninfected littermates (contact) for 5 days. Shedding of  
768 IAV was collected by gently dipping the nares of each mouse in viral media daily.  
769 Shedding samples from each day were evaluated individually via plaque assay for each  
770 pup. Shedding titers shown represent pooled values for days 1-5 for index pups and  
771 days 4-5 for contact pups, representing days of maximum shedding for each group (as  
772 per Fig. 2). Each symbol represent the shedding titer measured from a single mouse for  
773 a specific day. Index and contact pups are shown in black and red symbols,  
774 respectively. Median values are indicated. At the end of 5 days, pups and mothers were  
775 sacrificed, and transmission to contact pups was evaluated via plaque assay from  
776 retrograde URT lavages. Percentage of transmission among contact pups is displayed  
777 below the graph. (B) Serum from mother and pups were obtained at the time of  
778 sacrifice. Samples from individual mice were evaluated for IAV-specific IgG by ELISA.  
779 IgG geometric mean titers (GMT) are represented by a box plot extending from the 25<sup>th</sup>  
780 to 75<sup>th</sup> percentile for each data set. Whiskers for each box encompasses the minimum  
781 to maximum values. Median values are indicated by a line within the box.  
782 All panels represent at least two independent experiments. Differences in transmission  
783 were analyzed using the Fisher's exact test. \*  $p < 0.05$ , \*\*  $p < 0.01$ , \*\*\*  $p < 0.001$ , \*\*\*\*  
784  $p < 0.0001$ , PFU=plaque forming unit, LOD=Limit of detection, GMT=Geometric mean  
785 titer.

786

787 **Figure 4. *Streptococcus pneumoniae* sialidases limit acquisition of IAV via**  
788 **transmission.**

789 (A) Schematic timeline of experimental design. At day -1 or -3 (3-4 days of age), all  
790 pups in a litter were colonized IN with either wild-type Spn; mutant Spn lacking NanA,  
791 NanB, or both; or treated IN with *Vibrio cholerae* neuraminidase (VCNA) twice daily. At  
792 day 0, pups were infected IN with 250 PFU of A/X-31 (index), and cohoused with  
793 uninfected littermates (contact) for 4 days. Shedding of IAV was collected by dipping the  
794 nares of each mouse in viral media daily. Transmission to contact pups was evaluated  
795 at day 4. (B) Shedding samples from each day were evaluated individually via plaque  
796 assay for each pup. Shedding titers shown represent pooled values for days 1-4 for  
797 index pups and days 3-4 for contact pups. Each symbol represent the shedding titer  
798 measured from a single mouse for a specific day with median values indicated. Index  
799 and contact pups are shown in black and red symbols, respectively. At the end of 4  
800 days, pups were sacrificed, and transmission to contacts was evaluated via plaque  
801 assay from retrograde URT lavages. Percentage of transmission among contact pups is  
802 displayed below the graph. Density of colonizing Spn was measured in URT lavage  
803 samples of each pup. Each blue symbol represents the median Spn density  $\pm$   
804 interquartile range for each group. Differences in transmission were analyzed using the  
805 Fisher's exact test. \*  $p < 0.05$ , \*\*  $p < 0.01$ , \*\*\*  $p < 0.001$ , \*\*\*\*  $p < 0.0001$ , PFU=plaque  
806 forming unit, CFU=colony forming unit, LOD=Limit of detection.

807

808 **Figure S1. Window of IAV transmission.**

809 As Figure 1C, the window of transmission was evaluated by separating index and  
810 contact pups for a defined period prior to contact. After infection of index pups,  
811 uninfected contact pups were housed apart (in a separate cage) for additional  
812 timepoints, including 24, 48, and 72 hours prior to cohousing with infected index for 5  
813 days. Transmission to contact pups was evaluated via plaque assay from retrograde  
814 URT lavages. URT titers are represented by a box plot extending from the minimum to  
815 maximum values for each data set. Each symbol represent the titer measured from a  
816 single pup with median values indicated by a line within the box. Index and contact pups  
817 are shown in black and red symbols, respectively. URT=upper respiratory tract.  
818

819 **Figure S2. Mode of transmission is via direct pup-to-pup contact.**

820 Upper panels represent schematic for each experimental condition. The mother or cage  
821 contents were evaluated as possible sources of transmission (fomites). (A) All infants in  
822 one litter (4-7 days of age) were infected IN with 250 PFU of A/X-31 (index) while the  
823 second litter in a separate cage were left uninfected (contact). The mothers from the  
824 infected and uninfected cage were exchanged daily without disturbing the pups or cage  
825 contents. After 5 days, transmission to contact litter was evaluated via plaque assay  
826 from retrograde URT lavages. (B) Index pups in a litter were infected and kept  
827 separated from an uninfected contact litter as described above. Cages and cage  
828 contents (bedding) from infected and uninfected litters were exchanged daily. After 5  
829 days, transmission to contact litter was evaluated via plaque assay from retrograde URT  
830 lavages. (C) Index pups are infected IN with 250 PFU of A/X-31, and cohoused with  
831 uninfected littermates (contact) for 5 days prior to evaluating for transmission.



832 Transmission to pups and mother were evaluated via plaque assay from retrograde  
833 URT lavages. (D) Mother was infected IN with 250 PFU of A/X-31 and placed back with  
834 her uninfected litter. After 5 days, transmission to pups was evaluated via plaque assay  
835 from retrograde URT lavages.

836 URT titers are represented by a box plot extending from the minimum to maximum  
837 values for each data set. Each symbol represent the titer measured from a single pup  
838 with median values indicated by a line within the box. Index and contact pups are shown  
839 in black and red symbols, respectively. IAV=Influenza A virus, URT=upper respiratory  
840 tract, PFU=plaque forming unit, LOD=Limit of detection.

841

842 **Figure S3. Timing of IAV shedding corresponds to timing of transmission.**

843 Overlay of shedding data (Fig. 2) (black and red symbols) with transmission data (Fig.  
844 1D). Percent transmission was calculated for each day from raw data in Fig. 1D, and is  
845 indicated by blue symbols connected by a blue line. Area under the curve corresponds  
846 to the proportion of contact pups that have likely acquired IAV infection. IAV=Influenza A  
847 virus, PFU=plaque forming unit, LOD=Limit of detection.

848

849 **Figure S4. Correlation analyses of influenza virus transmission.**

850 (A) Mean URT titers (black) and mean shedding titers (green) from index pups were  
851 compared to transmission efficiency in contact pups. (B) Index pup shedding titers were  
852 compared among various influenza virus strains. Median values are indicated.

853 Threshold of transmission is displayed with dashed line, and was calculated using best-  
854 fit linear regression line equation in (A) when transmission  $X=33.3\%$ . This represents

855 the minimum level of shedding likely to result in transmission of 1 out of 3 contact pups.  
856 Each symbol represent the shedding titer measured from a single pup. Shedding titers  
857 shown represent at least 2 independent experiments. Transmissible virus and non-  
858 transmissible viruses are shown in green and gray symbols, respectively. (C) Age of  
859 mice (orange) was compared to transmission efficiency in contact mice. (D) Mean URT  
860 titers from index adult mice of 35 days of age (black) and transmission efficiency in  
861 contact adult mice of 35 days of age (blue) were compared to index mice inoculum virus  
862 titer.  
863 Pearson correlation ( $r$ ) was calculated for each data set. Best fit linear regression  
864 curves were fitted on data sets with adequate correlation and goodness of fit ( $R^2$ ) was  
865 calculated. Significance of  $r$  and  $R^2$  were calculated automatically by Graphpad Prism 7  
866 software, \*  $p < 0.05$ .

867

868 **Figure S5. Serum IgA levels does not correspond to inhibition of shedding.**

869 As per Fig. 3, serum from mother and pups were obtained at the time of sacrifice.  
870 Samples from individual mice were evaluated for IAV-specific IgA by ELISA. Assay  
871 controls include serum-deficient PBS samples (Neg) and normal mouse serum (N  
872 Serum). IgA geometric mean titers (GMT) are represented by a box plot extending from  
873 the 25<sup>th</sup> to 75<sup>th</sup> percentile for each data set. Whiskers for each box encompasses the  
874 minimum to maximum values. Median values are indicated by a line within the box. All  
875 panels represent at least two independent experiments. PFU=plaque forming unit,  
876 LOD=Limit of detection, GMT=Geometric mean titer.

877 **TABLE 1. Transmissibility of influenza viruses in infant mice**

| Virus                | Index <sup>a</sup>        |                         |                              | Contact <sup>b</sup>      |                         | Transmission <sup>f</sup> |
|----------------------|---------------------------|-------------------------|------------------------------|---------------------------|-------------------------|---------------------------|
|                      | No. Infected <sup>c</sup> | URT Titers <sup>d</sup> | Shedding Titers <sup>e</sup> | No. Infected <sup>c</sup> | URT Titers <sup>d</sup> |                           |
| <b>A/H3N2</b>        |                           |                         |                              |                           |                         |                           |
| A/X-31 <sup>g</sup>  | 8/8                       | 3.04±1.32               | 2.20±1.02                    | 15/15                     | 4.10±1.05               | 100                       |
| A/Hong Kong/1/1968   | 4/4                       | 4.85±0.40               | 2.62±0.67                    | 8/8                       | 5.64±0.35               | 100                       |
| A/X-47 <sup>h</sup>  | 3/3                       | 3.99±0.25               | 2.13±0.74                    | 2/9                       | 2.58±2.31               | 22.2                      |
| <b>A/H1N1</b>        |                           |                         |                              |                           |                         |                           |
| A/Puerto Rico/8/1934 | 4/4                       | 2.85±0.56               | N/A <sup>i</sup>             | 2/13                      | 2.51±0.44               | 15.4                      |
| A/WSN/1933           | 6/6                       | 4.18±0.63               | 1.43±0.64                    | 1/10                      | N/A <sup>i</sup>        | 10                        |
| A/Brisbane/59/2007   | 5/5                       | 2.50±1.74               | 1.63±0.75                    | 1/12                      | N/A <sup>i</sup>        | 8.3                       |
| A/California/4/2009  | 5/5                       | 3.77±0.32               | 1.26±0.42                    | 0/12                      | N/A <sup>i</sup>        | 0                         |
| <b>B</b>             |                           |                         |                              |                           |                         |                           |
| B/Lee/1940           | 5/5                       | 4.44±0.93               | 2.58±1.31                    | 12/15                     | 3.62±1.67               | 80                        |

878

879 <sup>a</sup> Index pups were infected IN with 250 PFU of virus.

880 <sup>b</sup> Uninfected contact pups were housed together with infected index pups at the time of  
881 inoculation for the duration of the experiment (4-8 days).

882 <sup>c</sup> Sum of index or contact pups assayed in at least 2 independent experiments.

883 <sup>d</sup> URT titers, expressed as the mean log<sub>10</sub> PFU/mL±STD, were assessed via plaque  
884 assay at time of sacrifice from retrograde tracheal lavages for each pup.

885 <sup>e</sup> Shedding titers, expressed as the mean log<sub>10</sub> PFU/mL±STD, were assessed via  
886 plaque assay from daily shedding samples collected for each pup.

887 <sup>f</sup> Percentage of contact pups containing detectable virus in the URT. A/H3N2 viruses  
888 were assayed after 4 days. A/PR/8, A/WSN, and B/Lee viruses were assayed after 4  
889 and 8 days. A/Brisbane and A/California were assayed after 8 days.

890 <sup>g</sup> HA/NA from A/Aichi/2/1968 (H3N2) + genes from A/Puerto Rico/8/1934 (H1N1)

891 <sup>h</sup> HA/NA from A/Victoria/3/1975 (H3N2) + genes from A/Puerto Rico/8/1934 (H1N1)

892 <sup>i</sup> Data not applicable for any value representing less than 2 pups

893 **TABLE 2**

| Mice Age <sup>c</sup>     | Index <sup>a</sup>        |                         | Contact <sup>b</sup>      |                         | Transmission <sup>f</sup> |
|---------------------------|---------------------------|-------------------------|---------------------------|-------------------------|---------------------------|
|                           | No. Infected <sup>d</sup> | URT Titers <sup>e</sup> | No. Infected <sup>d</sup> | URT Titers <sup>e</sup> |                           |
| 4                         | 3/3                       | 4.17±0.77               | 4/4                       | 4.66±0.50               | 100                       |
| 7                         | 7/7                       | 4.40±1.23               | 11/11                     | 3.94±1.04               | 100                       |
| 14                        | 9/9                       | 3.12±0.95               | 11/17                     | 3.41±1.00               | 64.7                      |
| 21                        | 4/4                       | 3.21±0.78               | 6/9                       | 2.82±0.78               | 66.7                      |
| <b>Weaned<sup>g</sup></b> |                           |                         |                           |                         |                           |
| 28                        | 3/3                       | 3.80±0.86               | 0/6                       | N/A <sup>h</sup>        | 0                         |
| 35                        | 5/5                       | 3.15±0.52               | 0/8                       | N/A <sup>h</sup>        | 0                         |
| 56                        | 6/6                       | 2.50±0.71               | 1/9                       | N/A <sup>h</sup>        | 11.1                      |

894

895 <sup>a</sup> Index mice were infected IN with 250 PFU of virus.

896 <sup>b</sup> Uninfected age-matched contact mice were housed together with infected index mice  
897 at the time of inoculation for the duration of the experiment (5 days).

898 <sup>c</sup> Age of mice expressed in days after birth.

899 <sup>d</sup> Sum of index or contact mice assayed in at least 2 independent experiments.

900 <sup>e</sup> URT titers, expressed as the mean log<sub>10</sub> PFU/mL±STD, were assessed via plaque  
901 assay at time of sacrifice from retrograde tracheal lavages for each mice.

902 <sup>f</sup> Percentage of contact mice containing detectable virus in URT after 5 days of contact.

903 <sup>g</sup> Mice weaned from breastfeeding and separated from the mother.

904 <sup>h</sup> Data not applicable for any value representing less than 2 pups

905

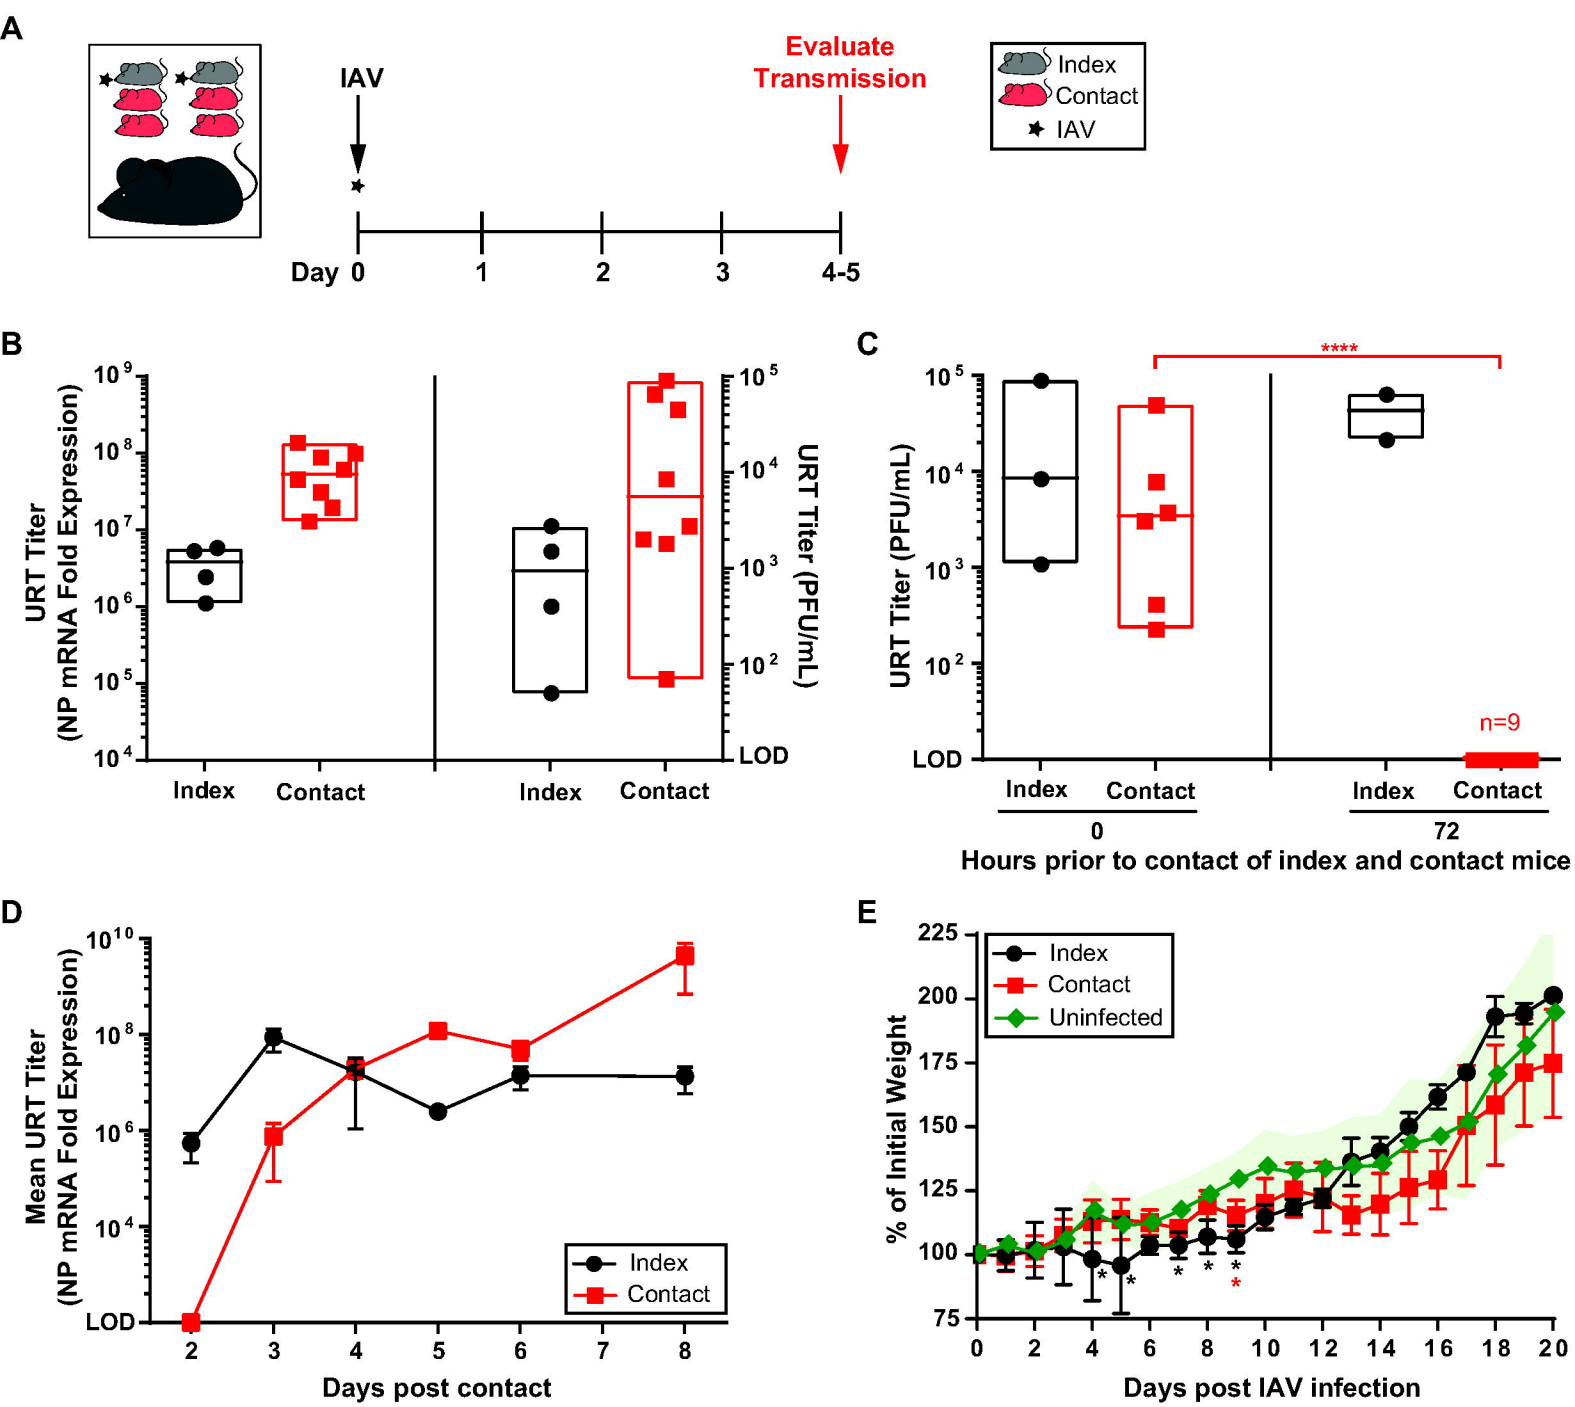

A

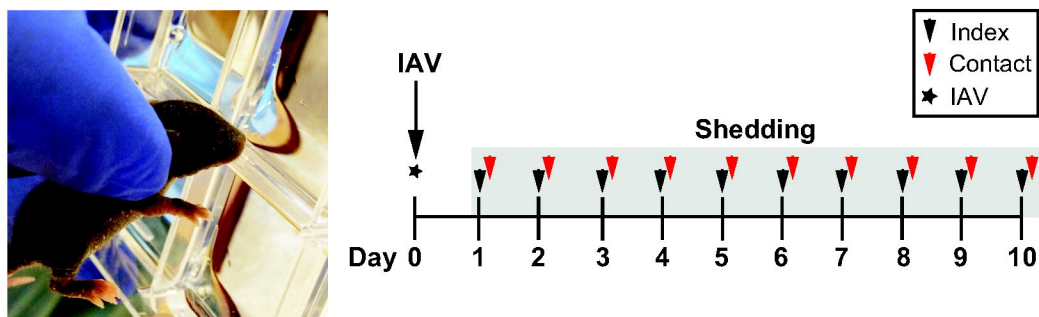

B

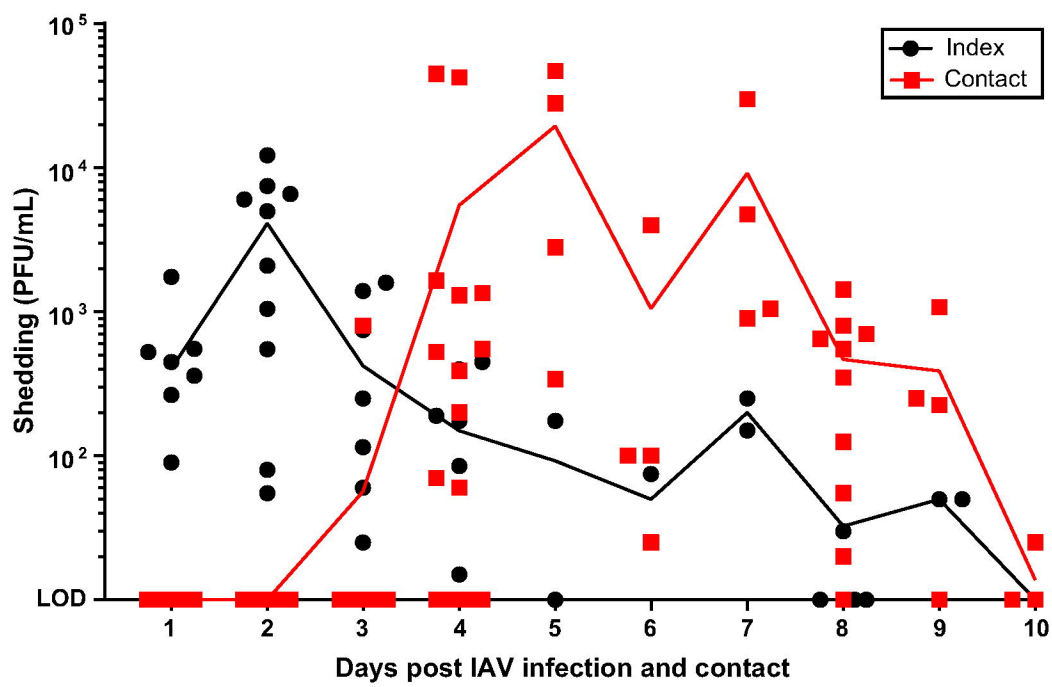

A

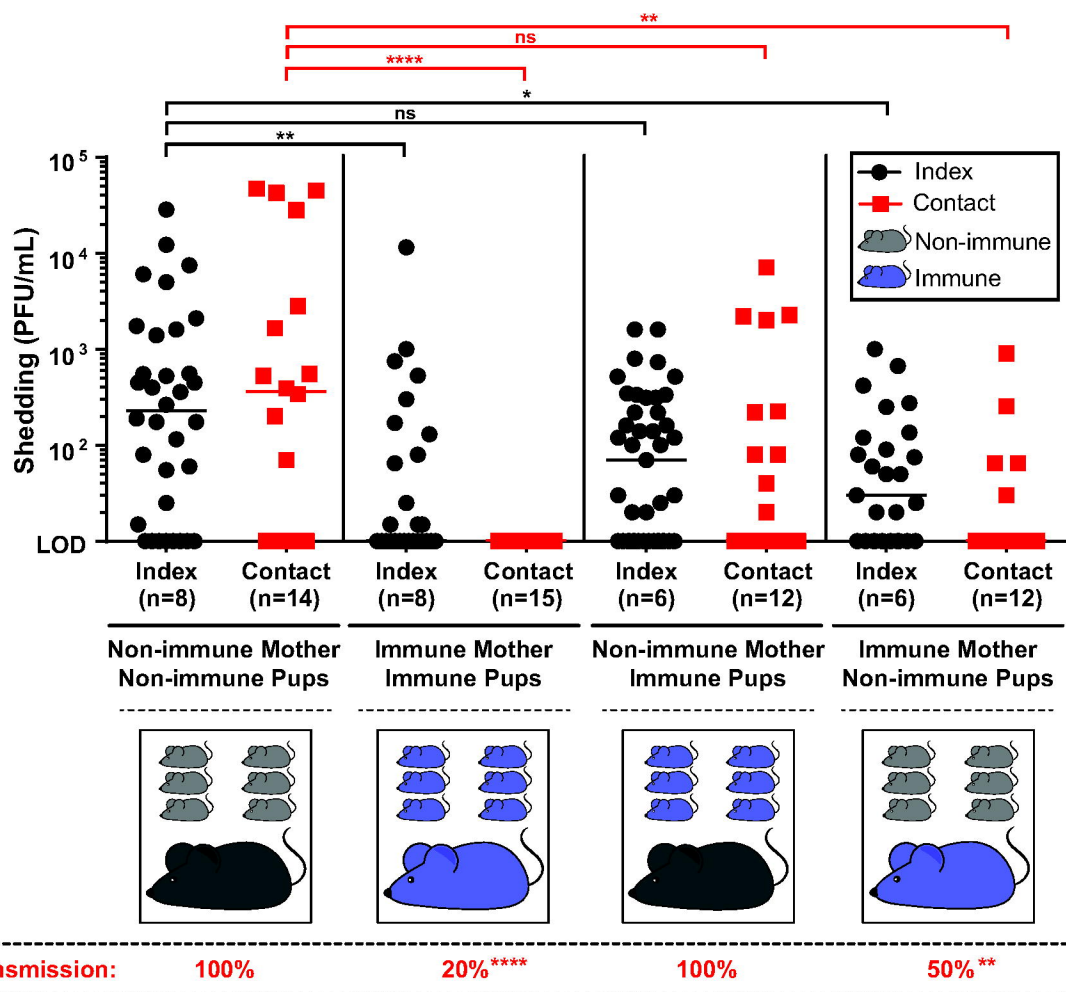

B

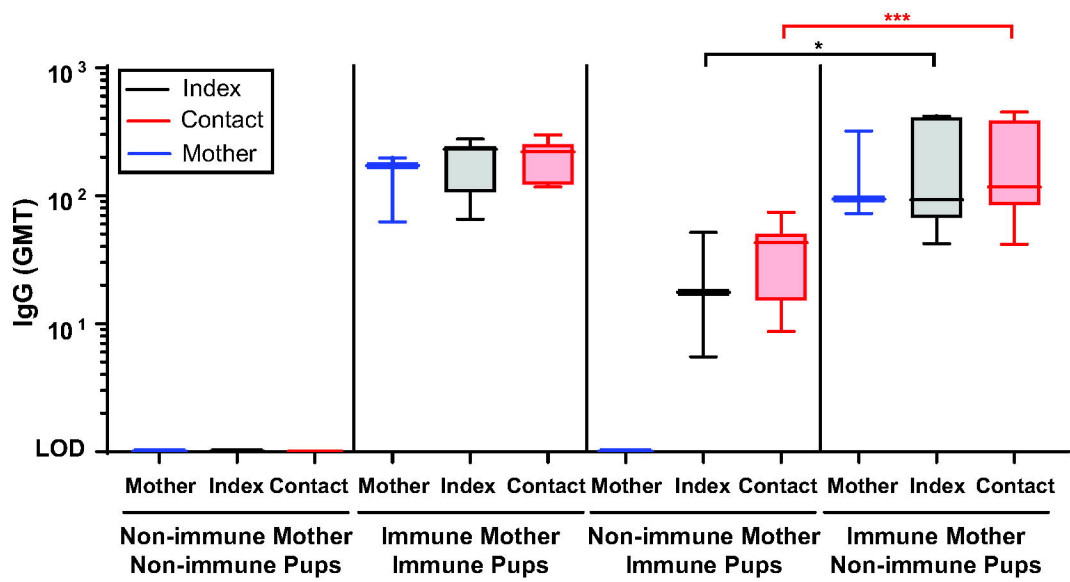

A

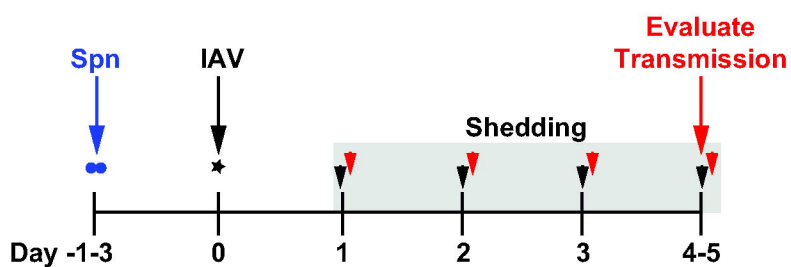

B

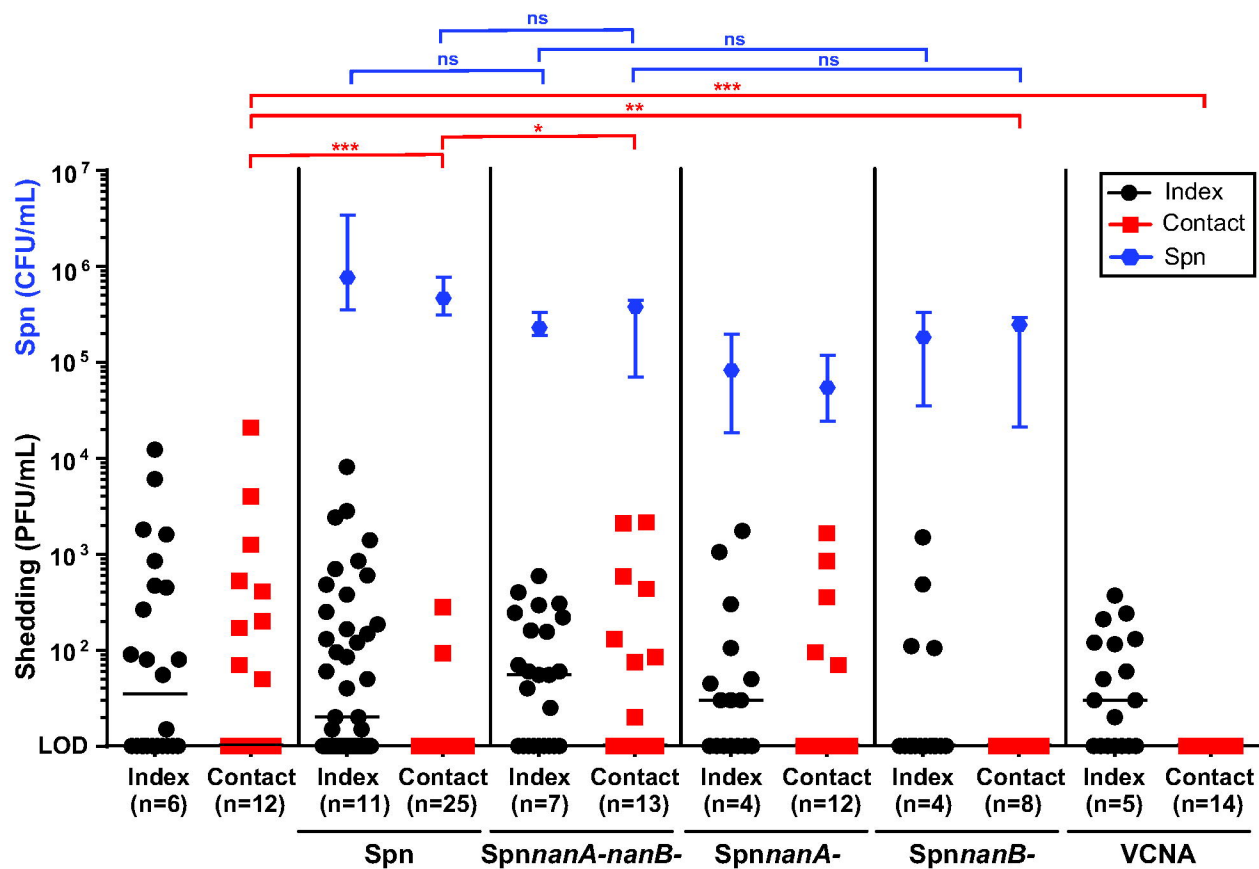

Transmission:

100%

32%\*\*\*\*

100%

66.7%

50%\*\*\*

71.4%
